# Supplementary material for: Implementation and Evaluation of a Breast Cancer Disease Model Using Real-World Claims Data in Germany from 2010 to 2020
Source: MDPI journal article supplement (doi:10.3390/cancers16081490), 2024-04-13
Supplement: s1 [file s1]

**Supplementary Table S1: Characterization of the provided data set**

|    | Description                      | NumPat | NumRec   | Variables                                                                                                                              |
|----|----------------------------------|--------|----------|----------------------------------------------------------------------------------------------------------------------------------------|
| 1  | Baseline                         | 97121  | 97121    | PatientID, BirthYear, Gender, InsuranceStatus, Schooling, Education, ZipCode, UrbanDensity, DeathYearMonth, StartDiagnosisC50YearMonth |
| 2  | Insurance period                 | 97121  | 899324   | PatientID, InsuranceYear, InsuranceDaysPerYear, CancellationReason                                                                     |
| 3  | Insurance program                | 51187  | 82647    | PatientID, Program, StartDate, EndDate, CancellationReason                                                                             |
| 4  | Disease management program       | 31752  | 46613    | PatientID, DMP_NR, Program, StartDate, EndDate                                                                                         |
| 5  | Hospital main ICD codes          | 86421  | 462302   | PatientID, CaseID, YearQuarter, StartDate, EndDate, ICD1, ICD1txt, DRG1                                                                |
| 6  | Hospital secondary ICD codes     | 83151  | 2593705  | PatientID, CaseID, YearQuarter, ICD2, ICD2txt                                                                                          |
| 7  | Hospital procedure OPS codes     | 83644  | 1451201  | PatientID, CaseID, YearQuarter, OPS, OPStxt                                                                                            |
| 8  | Outpatient specialty (AGS) codes | 97088  | 13843826 | PatientID, CaseID, YearQuarter, AGS, AGStxt, Origin                                                                                    |
| 9  | Outpatient ICD codes             | 97082  | 58952841 | PatientID, CaseID, YearQuarter, ICD, ICDtxt, Origin                                                                                    |
| 10 | Outpatient EBM codes             | 97088  | 90218288 | PatientID, CaseID, YearQuarter, EBM, EBMtxt, Origin                                                                                    |
| 11 | Pregnancies ICD and EBM codes    | 2101   | 3012     | PatientID, YearQuarter, BirthDate, ICD, EBM, Origin                                                                                    |
| 12 | Inability to work ICD codes      | 33225  | 386892   | PatientID, CaseID, YearQuarter, StartDate, EndDate, AGS, ICD                                                                           |
| 13 | Drug specialty (AGS) codes       | 96809  | 12154581 | PatientID, YearQuarter, ReceiptID, AGS, AGStxt, ReceiptDate                                                                            |
| 14 | Drug doses (DDD) and names (ATC) | 96809  | 18130721 | PatientID, YearQuarter, ReceiptID, PZN, PZNtxt, DDD, ATC, ATCtxt                                                                       |
| 15 | Drug doses (DDD) and names (ATC) | 23251  | 1663345  | PatientID, YearQuarter, ReceiptID, PZN, PZNtxt, DDD, ATC, ATCtxt                                                                       |

NumPat = number of patients, NumRec = number of records, DMP = disease management program, AGS = key defining the physician group, DRG = disease-related groups, DDD = defined daily dose, PZN = pharmaceutical central number

**Supplementary Table S2: List of relevant ICD codes, ATC codes, and OPS codes**

|                                                         |                                                                  |
|---------------------------------------------------------|------------------------------------------------------------------|
| <b>ICD</b>                                              |                                                                  |
| C50%                                                    | Breast Cancer                                                    |
| C77%                                                    | Lymph node metastasis                                            |
| C77.3                                                   | Axillary lymph node metastasis                                   |
| C77.9                                                   | Lymph node metastasis, not otherwise specified                   |
| C78%                                                    | Secondary malignant neoplasm of respiratory and digestive organs |
| C79%                                                    | Secondary malignant neoplasm of other and unspecified sites      |
|                                                         |                                                                  |
| <b>ATC chemotherapy</b>                                 |                                                                  |
| L01DB%                                                  | Anthracyclines                                                   |
| L01AA01                                                 | Cyclophosphamide                                                 |
| L01BC%                                                  | Antimetabolites                                                  |
| L01CD%                                                  | Taxanes                                                          |
| L01XA%                                                  | Platinum derivatives                                             |
|                                                         |                                                                  |
| <b>ATC palliative chemotherapy and targeted therapy</b> |                                                                  |
| L01EF01                                                 | Palbociclib                                                      |
| L01EF02                                                 | Ribociclib                                                       |
| L01EF03                                                 | Abemaciclib                                                      |
| L01XK01                                                 | Olaparib                                                         |
| L01XK02                                                 | Niraparib                                                        |
| L01XK03                                                 | Rucaparib                                                        |
| L01XK04                                                 | Talazoparib                                                      |
| L01XK05                                                 | Veliparib                                                        |
| L01EM03                                                 | Alpelisib                                                        |
| L01EG02                                                 | Everolimus                                                       |
| L01XC07                                                 | Bevacizumab                                                      |
| L01CA%                                                  | Vinca alkaloids                                                  |
| L01XX41                                                 | Eribulin                                                         |
|                                                         |                                                                  |
| <b>ATC endocrine therapy</b>                            |                                                                  |
| L02BA%                                                  | SERM/SERD (Fulvestrant, Tamoxifen)                               |
| L02BG%                                                  | Aromatase inhibitors                                             |
| L02AE%                                                  | GnRH analogues                                                   |
|                                                         |                                                                  |
| <b>ATC HER2-targeted therapy</b>                        |                                                                  |
| L01XC03                                                 | Trastuzumab                                                      |
| L01XC13                                                 | Pertuzumab                                                       |

|                                      |                                                         |
|--------------------------------------|---------------------------------------------------------|
| L01XC14                              | Trastuzumab-Emtansin                                    |
| L01XE07                              | Lapatinib (metastatic disease)                          |
| L01EH02                              | Neratinib                                               |
|                                      |                                                         |
| <b>OPS breast surgery</b>            |                                                         |
| 5870, 5872, 5874, 5877, 5879         | Breast surgery                                          |
| 54011%                               | Axillary sentinel node biopsy                           |
| 54021%                               | Axillary lymphonodectomie                               |
| 54040%, 54061%, 54070%               | Axillary lymphonodectomie without surgery of the breast |
|                                      |                                                         |
| <b>OPS biopsies and paracentesis</b> |                                                         |
| 1844%                                | Diagnostic puncture of the pleural cavity               |
| 1845%                                | Diagnostic liver puncture                               |
| 143%                                 | Biopsy of the respiratory system                        |
| 1481%                                | Biopsy of the bones                                     |
| 1441%                                | Needle-biopsy of the liver and the pancreas             |
| 8152%                                | Therapeutic puncture of thoracic organs                 |
| 8153%                                | Paracentesis                                            |
| 8154%                                | Therapeutic puncture of abdominal organs                |

% indicates that each number between 0 – 9 could be selected

**Supplementary Table S3: Match quality**

| Birth year difference | N     |
|-----------------------|-------|
| -2                    | 1     |
| -1                    | 2     |
| 0                     | 55714 |
| 1                     | 17    |
| 3                     | 1     |
| 5                     | 1     |
| 7                     | 2     |

**Supplementary Table S4: 5- and 10-year overall survival rates stratified after disease stage**

| Stage         | 5 year survival |       |       | 10 year survival |       |       | p value   |
|---------------|-----------------|-------|-------|------------------|-------|-------|-----------|
|               | N               | Mean  | SD    | N                | Mean  | SD    |           |
| Control       | 55738           | 0.834 | 0.002 | 55738            | 0.677 | 0.004 | reference |
| A early       | 18892           | 0.840 | 0.003 | 18892            | 0.663 | 0.007 | n.s       |
| B lymph nodes | 4732            | 0.793 | 0.007 | 4732             | 0.566 | 0.015 | p < 0.001 |
| C metastases  | 4245            | 0.354 | 0.008 | 4245             | 0.209 | 0.010 | p < 0.001 |

SD = Standard deviation

**Supplementary Table S5: 5-year overall survival rates stratified after disease stage and estimated tumor subtype**

| Tumor biology | Stage         | Breast Cancer |               |             | Control |               |             | p value   |
|---------------|---------------|---------------|---------------|-------------|---------|---------------|-------------|-----------|
|               |               | N             | Mean survival | SD survival | N       | Mean survival | SD survival |           |
| HR+/HER2+     | A early       | 1182          | 0.930         | 0.009       | 2364    | 0.948         | 0.005       | p < 0.01  |
| HR+/HER2-     | A early       | 13542         | 0.867         | 0.003       | 27084   | 0.847         | 0.002       | p < 0.01  |
| HR-/HER2+     | A early       | 472           | 0.896         | 0.016       | 944     | 0.931         | 0.009       | n.s       |
| HR-/HER2-     | A early       | 3696          | 0.705         | 0.008       | 7392    | 0.785         | 0.005       | p < 0.001 |
| HR+/HER2+     | B lymph nodes | 439           | 0.888         | 0.017       | 878     | 0.931         | 0.010       | p < 0.001 |
| HR+/HER2-     | B lymph nodes | 3581          | 0.821         | 0.007       | 7162    | 0.870         | 0.004       | p < 0.001 |
| HR-/HER2+     | B lymph nodes | 158           | 0.792         | 0.035       | 316     | 0.921         | 0.017       | p < 0.001 |
| HR-/HER2-     | B lymph nodes | 554           | 0.541         | 0.023       | 1108    | 0.790         | 0.014       | p < 0.001 |
| HR+/HER2+     | C metastases  | 309           | 0.532         | 0.032       | 618     | 0.881         | 0.014       | p < 0.001 |
| HR+/HER2-     | C metastases  | 2644          | 0.418         | 0.011       | 5288    | 0.770         | 0.006       | p < 0.001 |
| HR-/HER2+     | C metastases  | 187           | 0.494         | 0.039       | 374     | 0.869         | 0.019       | p < 0.001 |
| HR-/HER2-     | C metastases  | 1105          | 0.127         | 0.011       | 2210    | 0.678         | 0.011       | p < 0.001 |

**Supplementary Table S6: 5-year distant recurrence-free survival rates stratified after disease stage and estimated tumor subtype**

| Stage         | Tumor biology | N     | Mean survival | SD survival | p value   |
|---------------|---------------|-------|---------------|-------------|-----------|
| A early       | HR+/HER2+     | 1182  | 0.867         | 0.011       | reference |
| A early       | HR+/HER2-     | 13542 | 0.914         | 0.003       | p < 0.001 |
| A early       | HR-/HER2+     | 472   | 0.845         | 0.019       | n.s       |
| A early       | HR-/HER2-     | 3696  | 0.879         | 0.006       | n.s       |
| B lymph nodes | HR+/HER2+     | 439   | 0.809         | 0.021       | reference |
| B lymph nodes | HR+/HER2-     | 3581  | 0.821         | 0.007       | n.s       |
| B lymph nodes | HR-/HER2+     | 158   | 0.699         | 0.039       | p < 0.01  |
| B lymph nodes | HR-/HER2-     | 554   | 0.659         | 0.023       | p < 0.001 |
